# Supplementary material for: Renewal of embryonic and neonatal-derived cardiac-resident macrophages in response to environmental cues abrogated their potential to promote cardiomyocyte proliferation via Jagged-1–Notch1
Source: PubMed Central journal article supplement — Acta Pharm Sin B. 2022 Aug 27;13(1):128–41. doi: 10.1016/j.apsb.2022.08.016 (PMC9939321; doi:10.1016/j.apsb.2022.08.016), 2022-08-27
Supplement: mmc1.pdf [file mmc1.pdf]

**Supporting Information for**

**Original article**

**Renewal of embryonic and neonatal-derived cardiac-resident macrophages in response to environmental cues abrogated their potential to promote cardiomyocyte proliferation *via* Jagged-1–Notch1**

**Rong Chen<sup>a,b</sup>, Shiqing Zhang<sup>a,b,†</sup>, Fang Liu<sup>a,†</sup>, Lin Xia<sup>a,c</sup>, Chong Wang<sup>a,b</sup>, Siamak Sandoghchian Shotorbani<sup>d</sup>, Huaxi Xu<sup>a</sup>, Subrata Chakrabarti<sup>e,f</sup>, Tianqing Peng<sup>e,f,\*</sup>, Zhaoliang Su<sup>a,b,\*</sup>**

<sup>a</sup>*International Genome Center, Jiangsu University, Zhenjiang 212013, China*

<sup>b</sup>*Institute for Medical Immunology, Jiangsu University, Zhenjiang 212013, China*

<sup>c</sup>*Department of Laboratory Medicine, Affiliated Hospital of Jiangsu University, Zhenjiang 212001, China*

<sup>d</sup>*Department of Immunology, Tabriz University of Medical Sciences, Tabriz 5173957616, Iran*

<sup>e</sup>*Lawson Health Research Institute, London Health Sciences Centre, London, Ontario N6A 5W9, Canada*

<sup>f</sup>*Department of Pathology and Laboratory Medicine, Western University, London, Ontario N6A 5C1, Canada*

Received 2 February 2022; received in revised form 7 July 2022; accepted 18 August 2022

\*Corresponding authors. Tel.: +86 511 88780266.

E-mail addresses: [szl30@ujs.edu.cn](mailto:szl30@ujs.edu.cn) (Zhaoliang Su), [tpeng2@uwo.ca](mailto:tpeng2@uwo.ca) ([Tianqing Peng](#)).

<sup>†</sup>These authors made equal contributions to this work.

**Supporting Figures Fig. S1–S5**

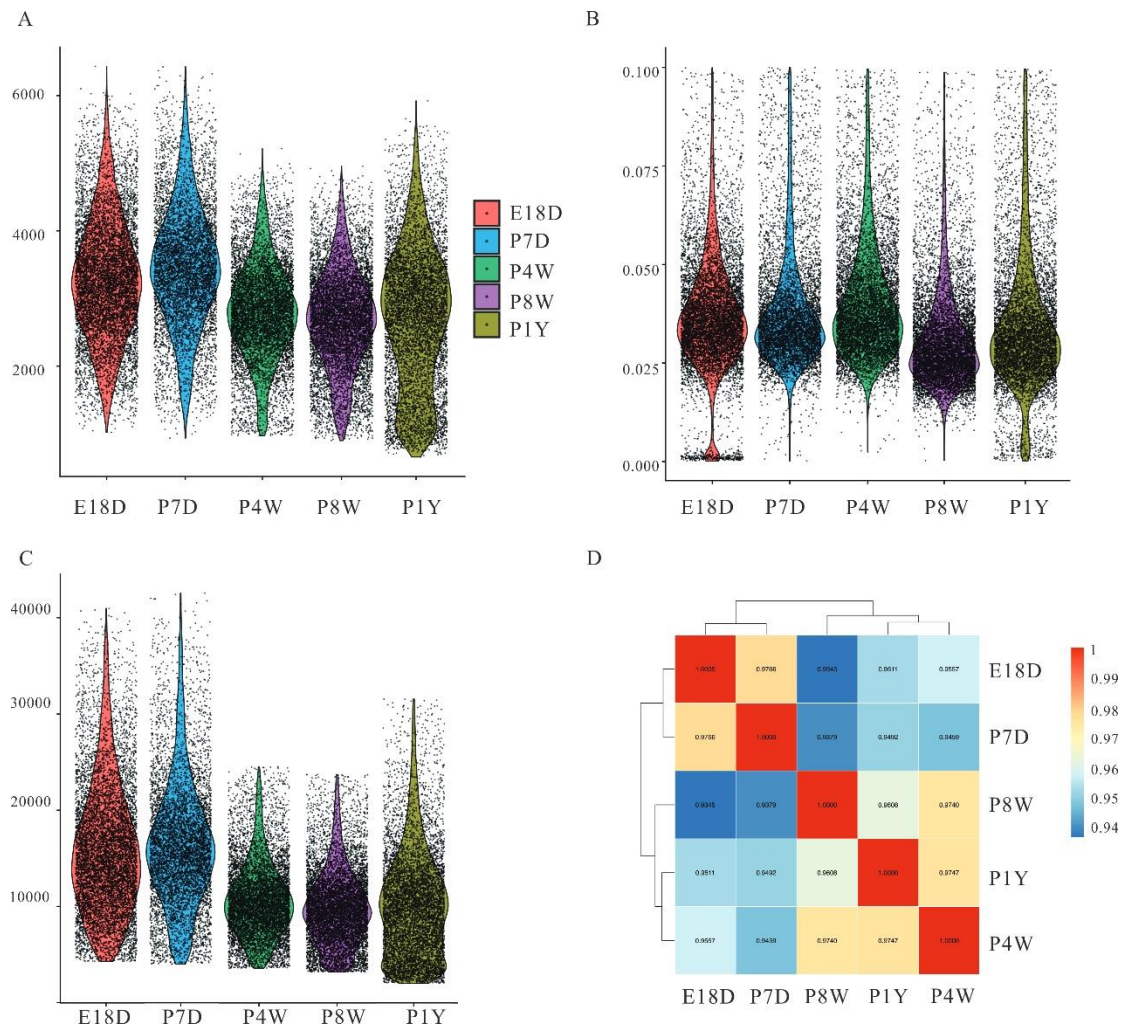

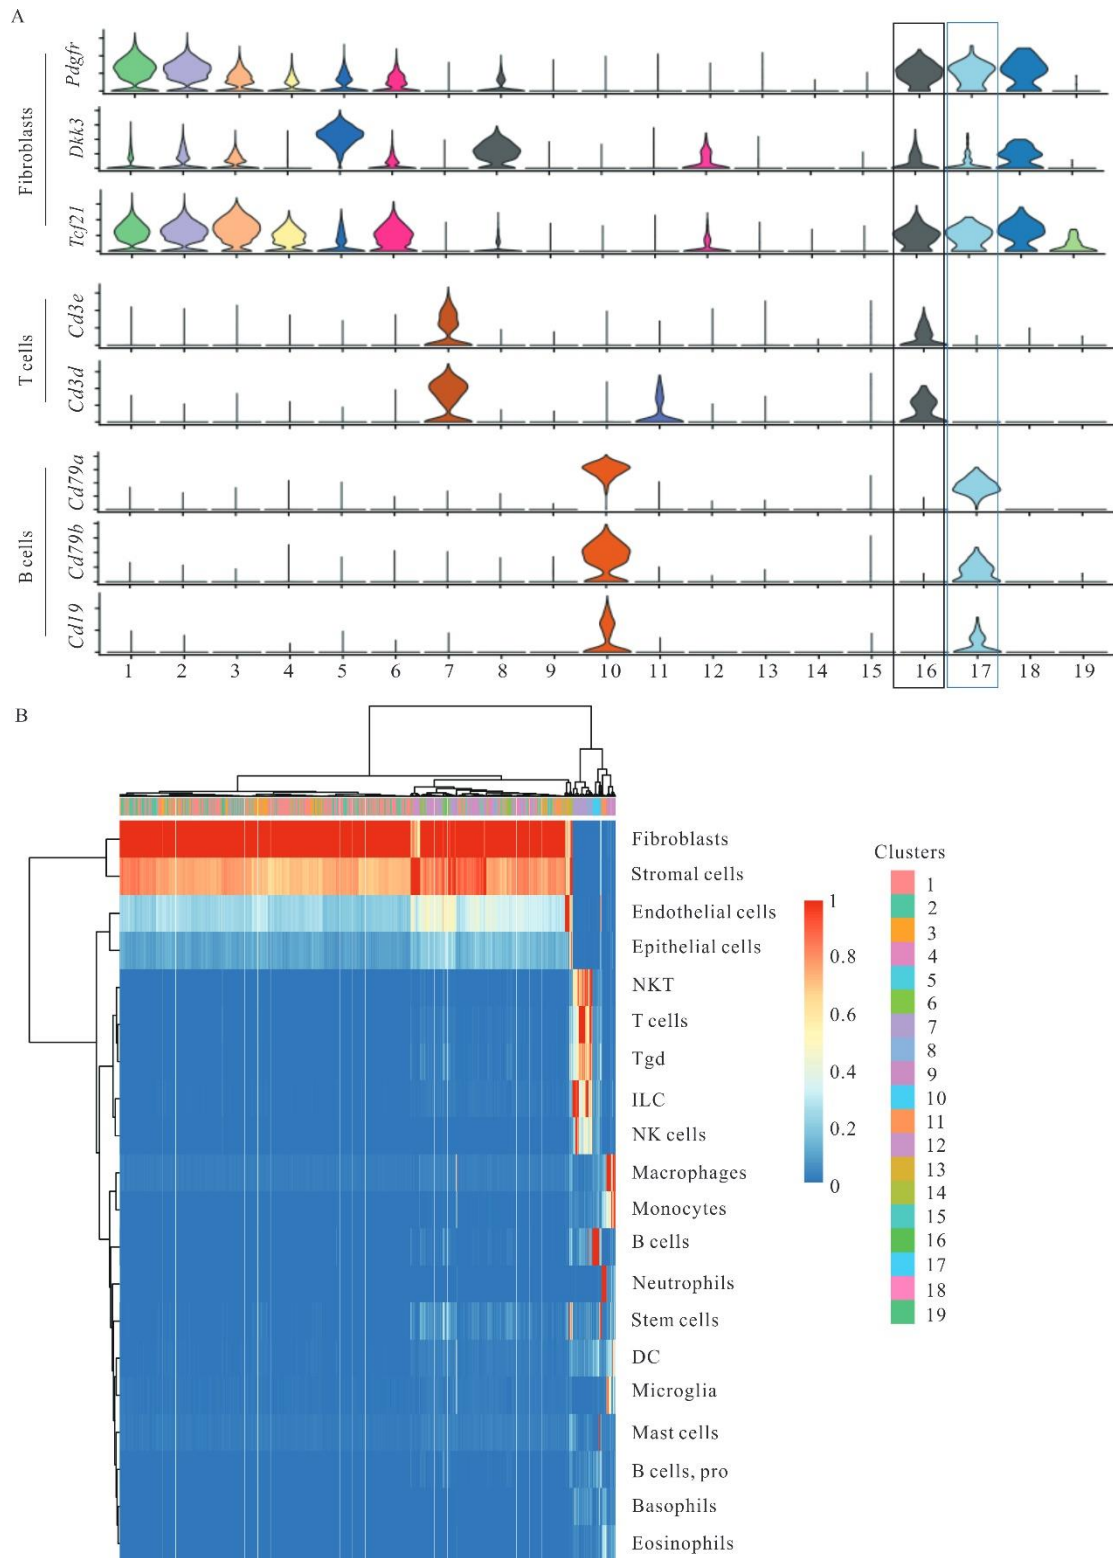

**Figure S2.** (A) Violin plots show the expression level of representative T cells, B cells, and fibroblast marker genes across the 19 main clusters. Y-axis is log scale normalized read count. (B) Correlation between the single-cell RNA sequencing data and reference data sets, using the SingleR package to annotate the cell type. 8000-10,000 cells per group.

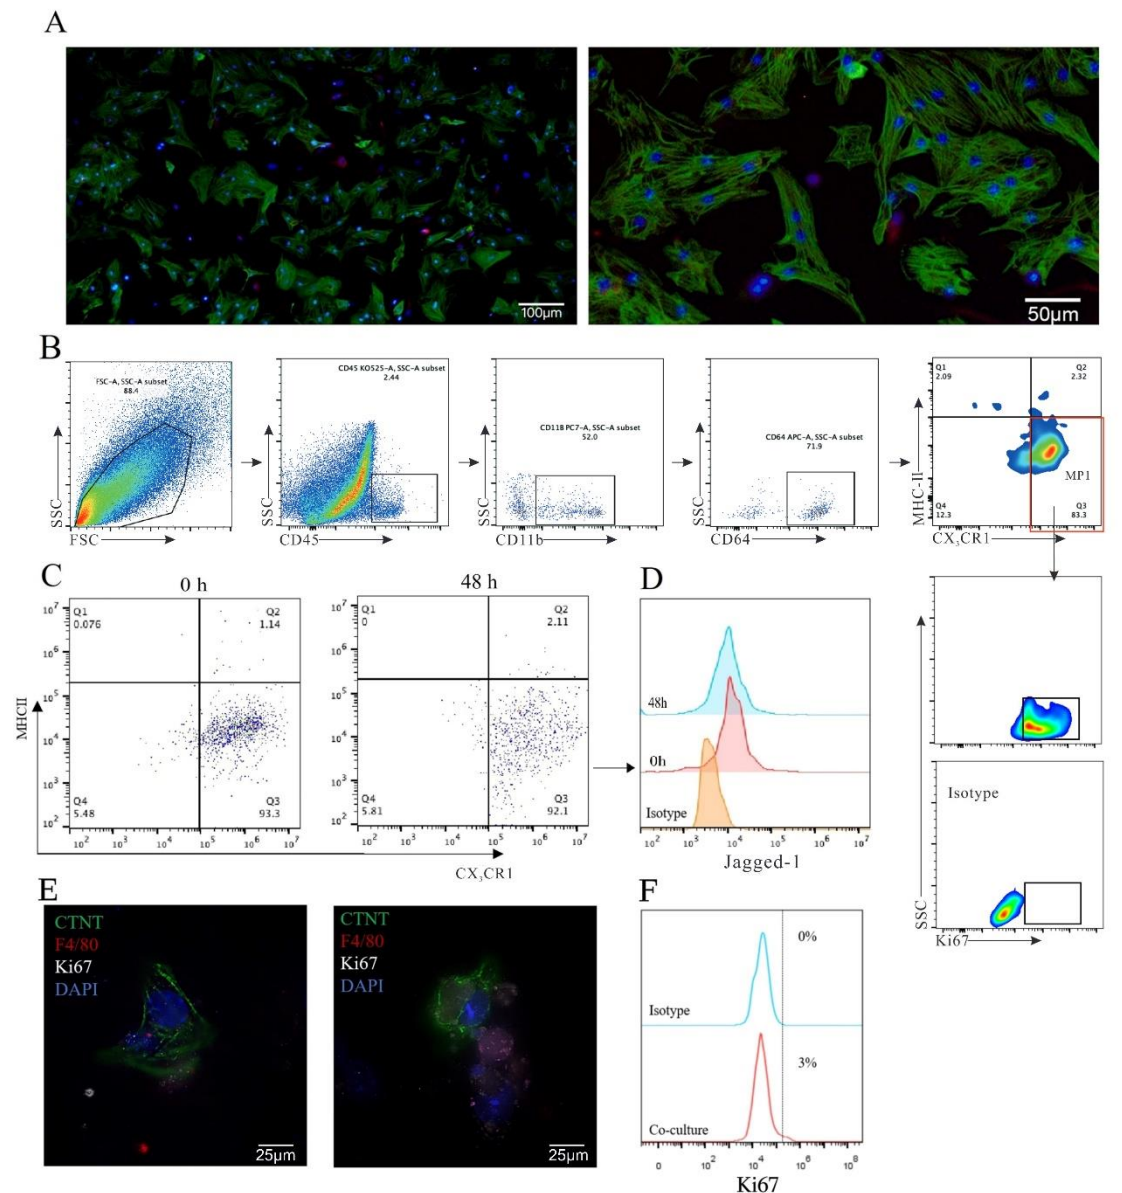

**Figure S3.** (A) The purity of isolated neonatal mouse cardiomyocytes was identified by immunofluorescence staining. (B) The proportions of MP1 and their expression of Ki67 in embryonic or neonatal mice.  $CD45^+CD64^+CX3CR1^+MHCII^-$  were gated to reveal MP1s proportions.  $Ki67^+$  MP1 were gated to analyze their proliferative ability. (C, D) MP1 phenotype was unchanged during in vitro culturing for 48 h by flow cytometry. (E) Immunofluorescence was analyzed by laser confocal microscopy, CRMs were labeled by F4/80, cardiomyocytes were labeled by cTNT. (F) Mean fluorescence intensity of Ki67 signal in CRMs from embryonic and neonatal mice co-cultured with neonatal mouse cardiomyocytes. All the data were repeated three times.

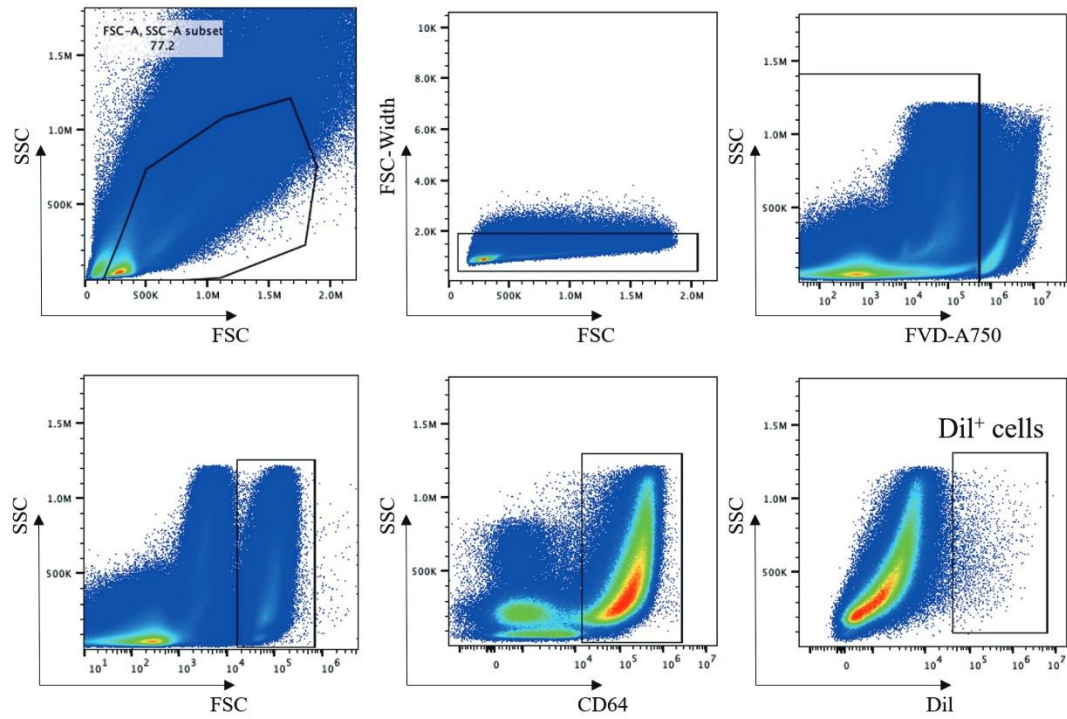

**Figure S4.** Dil-labeled CRMs have entered heart. Six-week-old male BALB/c mice were used to establish MI models by ligating the left coronary artery, then  $2 \times 10^4$  labeled CRMs by  $10 \mu\text{mol/L}$  Dil from embryonic or neonatal mice were intramyocardial injection in the ischemic **left anterior descending coronary artery** territory immediately into MI mice, five mice were included. MI means myocardial infarction.

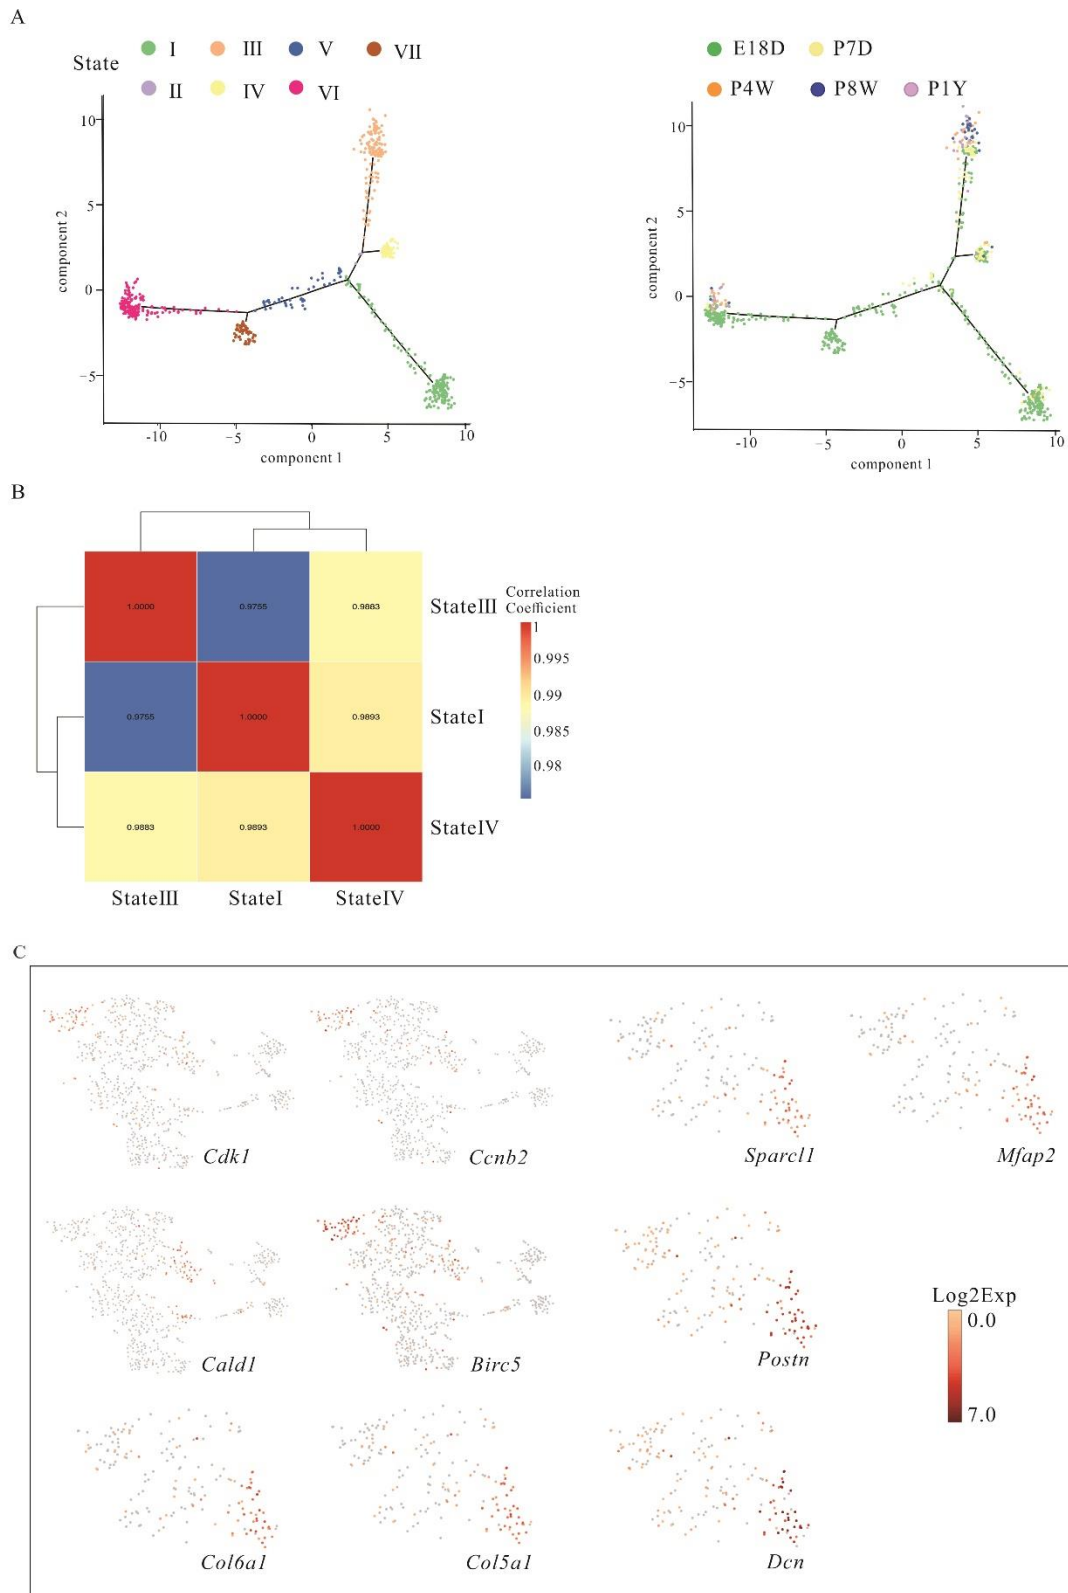

**Figure S5. Trajectory analysis of CRMs.** (A) Ordering macrophages along a cell conversion trajectory using Monocle package. Each color indicates a time point or a CRM state. (B) The heatmap shows mean correlation coefficient between gene expression profiles of MP1 from different states. (C) Cell distributions of pseudotime-

based “state I”, “state III” and “state IV” MP1 on t-SNE map. T-SNE sub-clustering of “state I” based on their marker genes. T-SNE plots show upregulated expression of representative cell cycle genes (red). 30–50 cells per category were included. E18D, P7D, P4W and P1Y mean embryonic Day 18, post-natal 7 days, 4 and 8 weeks, and 1-year-old, respectively.
